# Supplementary material for: CeRNA Expression Profiling Identifies KIT-Related circRNA-miRNA-mRNA Networks in Gastrointestinal Stromal Tumour
Source: PubMed Central journal article supplement (PMC6746987; doi:10.3389/fgene.2019.00825), 2019-09-10

## Supplemental Information

# CeRNA Expression Profiling Identifies KIT Related circRNAs-miRNA-mRNA Networks in Gastrointestinal Stromal Tumors

Ning Jia<sup>1,2,#</sup>, Hanxing Tong<sup>3,#</sup>, Yong Zhang<sup>3,#</sup>, Hiroshi Katayama<sup>4</sup>, Yuan Wang<sup>1</sup>,  
Weiqi Lu<sup>3</sup>, Sumei Zhang<sup>1,\*</sup>, Jin Wang<sup>2,\*</sup>

<sup>1</sup>Laboratory of Molecular Biology and Department of Biochemistry, Anhui Medical University, Hefei, Anhui 230032, China; <sup>2</sup>Shanghai Public Health Clinical Center, Fudan University, 2901 Caolang Road, Jinshan District, Shanghai 201508, China; <sup>3</sup>Department of General Surgery, Zhongshan Hospital, Fudan University, Shanghai 200032, China; <sup>4</sup>Department of Molecular Oncology, Okayama University Graduate School of Medicine, Dentistry and Pharmaceutical Sciences, Okayama, Japan.

**Running Title:** CircRNAs Expression Profiling Identifies specific circRNAs in GIST

# These authors contributed equally to this work

### \*Corresponding Author:

Jin Wang, Ph.D.

Shanghai Public Health Clinical Center, Fudan University,  
2901 Caolang Road, Jinshan District, Shanghai 201508, China;

Ph: 86-21-37990333-7336;

Fax: 86-21-5724247094

Email: [wjncityu@yahoo.com](mailto:wjncityu@yahoo.com)

Sumei Zhang, Ph.D

Laboratory of Molecular Biology and Department of Biochemistry,  
Anhui Medical University,  
Hefei, Anhui 230032, China

Ph:86-18905699327

E-mail: [379236778@qq.com](mailto:379236778@qq.com)

## 1. Supplementary Tables:

1.1) Table S1. The primers for DEcircRNAs and their host genes in GISTs.

| Gene/circRNA     | Forward Primer              | Reverse Primer                |
|------------------|-----------------------------|-------------------------------|
| KIT              | 5'- TGTCTGTGTCCAAAGCAAGC-3' | 5'- CACCGTGATGCCAGCTATTA-3'   |
| ETV1             | 5'- CACCGAATTGAGCTCTGTCA-3' | 5'- CGAAAGGCTGCAAAACTTC-3'    |
| PLAT             | 5'- GGAAGGAGCAAGCCGTGAAT-3' | 5'- GCGCAGCCATGACTGATGTT-3'   |
| 18s rRNA         | 5'- GTAACCCGTTGAACCCCAT-3'  | 5'- CCATCCAATCGGTAGTAGCG-3'   |
| hsa_circ_0069765 | 5'- CATCCCCACACCCTGTTCAC-3' | 5'- CAACGTTGCCTGACGTTTCAT-3'  |
| hsa_circ_0079471 | 5'- CAGGAACCCAGAGATTTTGC-3' | 5'- CATTCCCCTTGTGGCTTCT-3'    |
| hsa_cir_0084097  | 5'- GCCACTCAGTGCCTGTCAAA-3' | 5'- CCTCTCTTCATTGCATCCATGA-3' |

## 1.2) Table S2. The primers for miRNAs in GISTs.

| Name             | Sequence                                            |
|------------------|-----------------------------------------------------|
| miR-1246UPLRT    | GTTGGCTCTGGTGCAGGGTCCGAGGTATTCGCACCAGAGCCAACCCTGCT  |
| miR-1246FWQ      | TCGCGAATGGATTTTTGG                                  |
| miR-324-5p UPLRT | GTTGGCTCTGGTGCAGGGTCCGAGGTATTCGCACCAGAGCCAACCACCAA  |
| miR-324-5pFWQ    | GCGGCGGCGCATCCCCTAGGGCA                             |
| miR-142-5p UPLRT | GTTGGCTCTGGTGCAGGGTCCGAGGTATTCGCACCAGAGCCAACAGTAGT  |
| miR-142-5p FWQ   | TCGCGCATAAAGTAGAAAGC                                |
| RNU6B-UPLRT      | GTTGGCTCTGGTGCAGGGTCCGAGGTATTCGCACCAGAGCCAACAAAATAT |
| RNU6B-FWQ        | TTCCTCCGCAAGGATGACACGC                              |
| miRuniRevQ       | GTGCAGGGTCCGAGGT                                    |

**1.3. Table S3. Characteristics of GIST patient population and the clinical detail of the three samples of GIST patients chosen for SBC ceRNA arrays.**

| <b>characteristic</b>        | <b>No. of the case<br/>(n = 68)</b> | <b>Percentage<br/>(%)</b> | <b>Patient 1<br/>(PID:186795T)</b> | <b>Patient 2<br/>(PID:189169T)</b> | <b>Patient 3<br/>(PID:189776T)</b> |
|------------------------------|-------------------------------------|---------------------------|------------------------------------|------------------------------------|------------------------------------|
| <b>Age</b>                   |                                     |                           |                                    |                                    |                                    |
| <60                          | 30                                  | 44.11                     | ✓ (52)                             |                                    | ✓ (55)                             |
| >60                          | 38                                  | 55.89                     |                                    | ✓ (64)                             |                                    |
| <b>sex</b>                   |                                     |                           |                                    |                                    |                                    |
| male                         | 43                                  | 63.23                     |                                    |                                    | ✓                                  |
| female                       | 25                                  | 36.77                     | ✓                                  | ✓                                  |                                    |
| <b>location</b>              |                                     |                           |                                    |                                    |                                    |
| stomach                      | 39                                  | 57.35                     | ✓                                  | ✓                                  | ✓                                  |
| other                        | 29                                  | 42.64                     |                                    |                                    |                                    |
| <b>Metastasis</b>            |                                     |                           |                                    |                                    |                                    |
| Yes                          | 12                                  | 17.64                     |                                    |                                    | ✓                                  |
| No                           | 56                                  | 82.36                     | ✓                                  | ✓                                  |                                    |
| <b>Vascular invasion</b>     |                                     |                           |                                    |                                    |                                    |
| Yes                          | 10                                  | 14.7                      |                                    |                                    | ✓                                  |
| No                           | 58                                  | 82.3                      | ✓                                  | ✓                                  |                                    |
| <b>Adhesion</b>              |                                     |                           |                                    |                                    |                                    |
| Yes                          | 30                                  | 44.11                     |                                    |                                    | ✓                                  |
| No                           | 38                                  | 55.89                     | ✓                                  | ✓                                  |                                    |
| <b>Maxium tumor diameter</b> |                                     |                           |                                    |                                    |                                    |
| <10 cm                       | 53                                  | 77.94                     | ✓ (4.0)                            | ✓ (5.1)                            |                                    |
| >10 cm                       | 15                                  | 22.06                     |                                    |                                    | ✓ (17)                             |
| <b>NIH grade</b>             |                                     |                           |                                    |                                    |                                    |
| low risk                     | 26                                  | 38.23                     | ✓                                  | ✓                                  |                                    |
| intermediate and high risk   | 42                                  | 61.77                     |                                    |                                    | ✓                                  |

**1.4) Table S4.** Characteristics of the DEGs profiles of GISTs in the GEO datasets.

| <b>Accession</b> | <b>mRNA/miRNA</b> | <b>Sample size<br/>(tumor/non-<br/>neoplastic tissue)</b> | <b>Platform</b>                | <b>Number of<br/>assayed genes</b> |
|------------------|-------------------|-----------------------------------------------------------|--------------------------------|------------------------------------|
| GSE112           | mRNA              | 22/7                                                      | Human Unigene I                | 57714                              |
| GSE31741         | miRNAs            | 32                                                        | Agilent miRNA<br>microarray V3 | 776                                |

**1.5) Table S5.** The correlation analysis of the expression of DEcircRNAs and host genes.

| <b>circRNA/Gene</b>       | <b>Pearson correlation coefficient</b> | <b>P-value</b> |
|---------------------------|----------------------------------------|----------------|
| PLAT/circ_0084097         | 0.640                                  | 0.001          |
| PLAT/circ_0079471         | 0.701                                  | 0.001          |
| PLAT/circ_0069765         | 0.379                                  | 0.003          |
| ETV1/circ_0079471         | 0.431                                  | 0.001          |
| ETV1/circ_0084097         | 0.242                                  | 0.060          |
| ETV1/circ_0069765         | 0.575                                  | 0.000          |
| PLAT/ETV1                 | 0.411                                  | 0.001          |
| circ_0069765/circ_0079471 | 0.424                                  | 0.001          |
| circ_0069765/cir_0084097  | 0.234                                  | 0.070          |
| circ_0079471/circ_0084097 | 0.570                                  | 0.000          |

**1.6) Table S6.** Context score percentile of 6 miRNAs that bind to the circ\_0069765, circ\_0084097, and circ\_0079471 sequences.

| <b>CircRNA/ Mirbase ID</b>   | <b>CircRNA - miRNA pairing</b> | <b>Site Type</b> | <b>Context + score percentile</b> |
|------------------------------|--------------------------------|------------------|-----------------------------------|
| hsa_circ_0069765 (5' ... 3') | UAACAACAAAGAGCAAAUCCAUC<br>    | 7mer-m8          | 85                                |
| hsa-miR-1246 (3' ... 5')     | GGACGAGGUUUUUAGGUAA            |                  |                                   |
| hsa_circ_0069765 (5' ... 3') | UCUUCCTCAUGAUAAACACUACA<br>    | 8mer-1a          | 99                                |
| hsa-miR-142-3p (3' ... 5')   | AGGUUUUCAUCCUUUGUGAUGU         |                  |                                   |
| hsa_circ_0069765 (5' ... 3') | UGUGGCAGCAGGAUU--CCCAGAGC<br>  | 7mer-m8          | 93                                |
| hsa-miR-326 (3' ... 5')      | GACCUCCUCCCGGGUCUCC            |                  |                                   |
| hsa_circ_0084097 (5' ... 3') | UUCGCCCAGCCAGGAAAUCCAUG<br>    | 7mer-m8          | 82                                |
| hsa-miR-1246 (3' ... 5')     | GGACGAGGUUUUUAGGUAA            |                  |                                   |
| hsa_circ_0084097 (5' ... 3') | CCCGAUUCAGAAGAG---GAGCCAGA<br> | 8mer-1a          | 99                                |
| hsa-miR-149 (3' ... 5')      | CCCUCACUUCUGUGCCUCGGUCU        |                  |                                   |
| hsa_circ_0084097 (5' ... 3') | CUGUGAAGCAAUCAUGGAUGCAA<br>    | 7mer-1a          | 88                                |
| hsa-miR-324-5p (3' ... 5')   | UGUGGUUACGGGAUCCCCUACGC        |                  |                                   |
| hsa_circ_0079471 (5' ... 3') | AUGAUUAAACAGGAA---CCCAGAGA<br> | 8mer-1a          | 99                                |
| hsa-miR-326 (3' ... 5')      | GACCUCCUCCCGGGUCUCC            |                  |                                   |
| hsa_circ_0079471 (5' ... 3') | AGUACCACGACCCAGUGUAUGAA<br>    | 8mer-1a          | 93                                |
| hsa-miR-485-3p (3' ... 5')   | UCUCUCCUCUCGGCACAUCUG          |                  |                                   |

## 2. Supplementary Figures:

**2.1) Figure S1.** Volcano plot showed the DEmRNAs (A) and DecircRNAs (B) in GISTs: blue points represented down regulated mRNA in cancer tissues, while red points indicated up regulated mRNA in tumor samples in volcano plots.

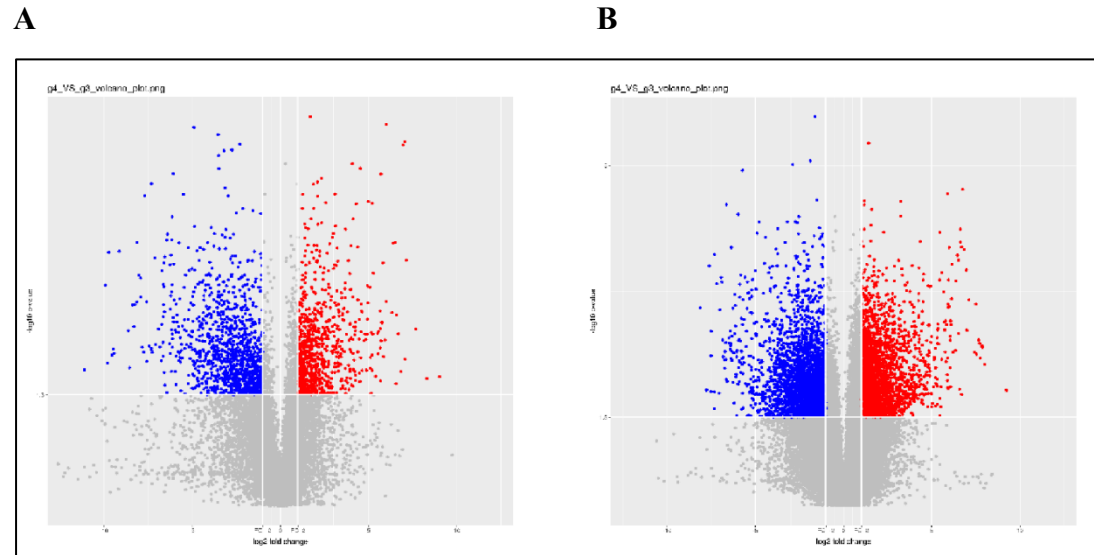



2.2) **Figure S2.** The location analysis of DEcircRNAs and their host genes in chromosome. A) circ\_0069765 and KIT; B) circ\_0079471 and ETV1. C) circ\_0084097 and PLAT. The distinct products of these three circRNAs were confirmed by Sanger sequencing (Fig. S2D-F). circRNAs were resistant to RNase R, compared to the linear mRNAs (Fig. S2G-I).

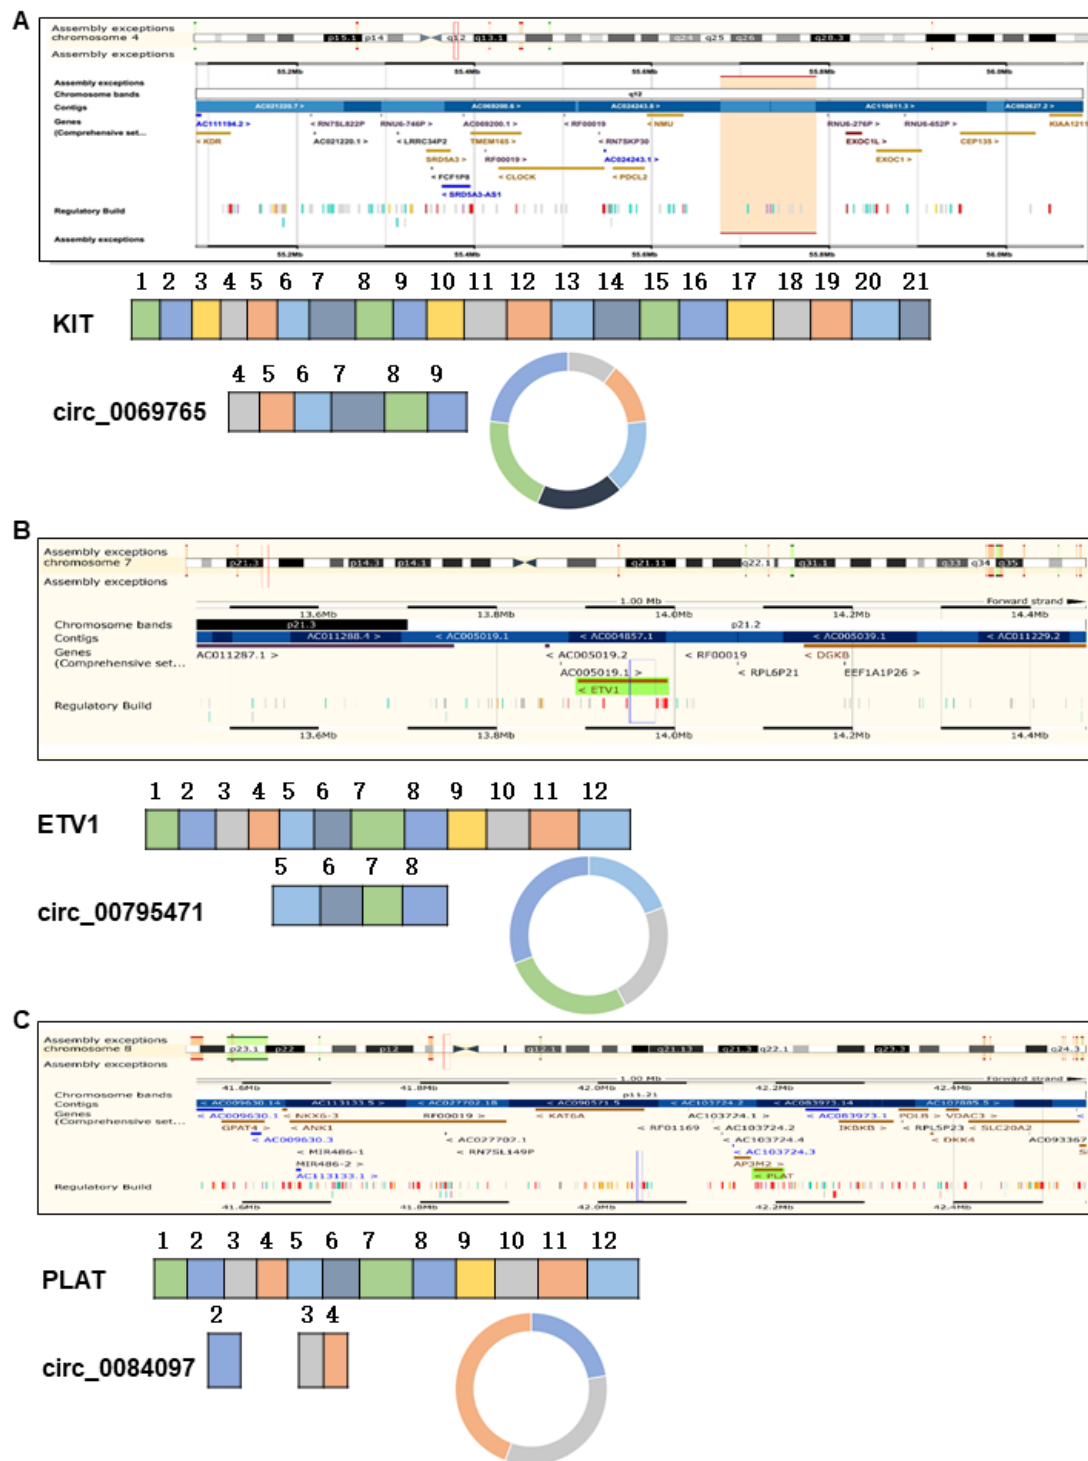

**2.3) Figure S3.** The sequences of the three circRNAs (circ\_0069765, circ\_0079471, and circ\_0084097) including their splicing junctions were confirmed by Sanger sequencing (A-C): A) circ\_0069765; B) circ\_0079471; C) circ\_0084097; and circRNAs were resistant to RNase R, compared to the linear mRNAs, which were shown in 2% DNA gels (D-F). D) circ\_0069765 and KIT; E) circ\_0079471 and ETV1. F) circ\_0084097 and PLAT.

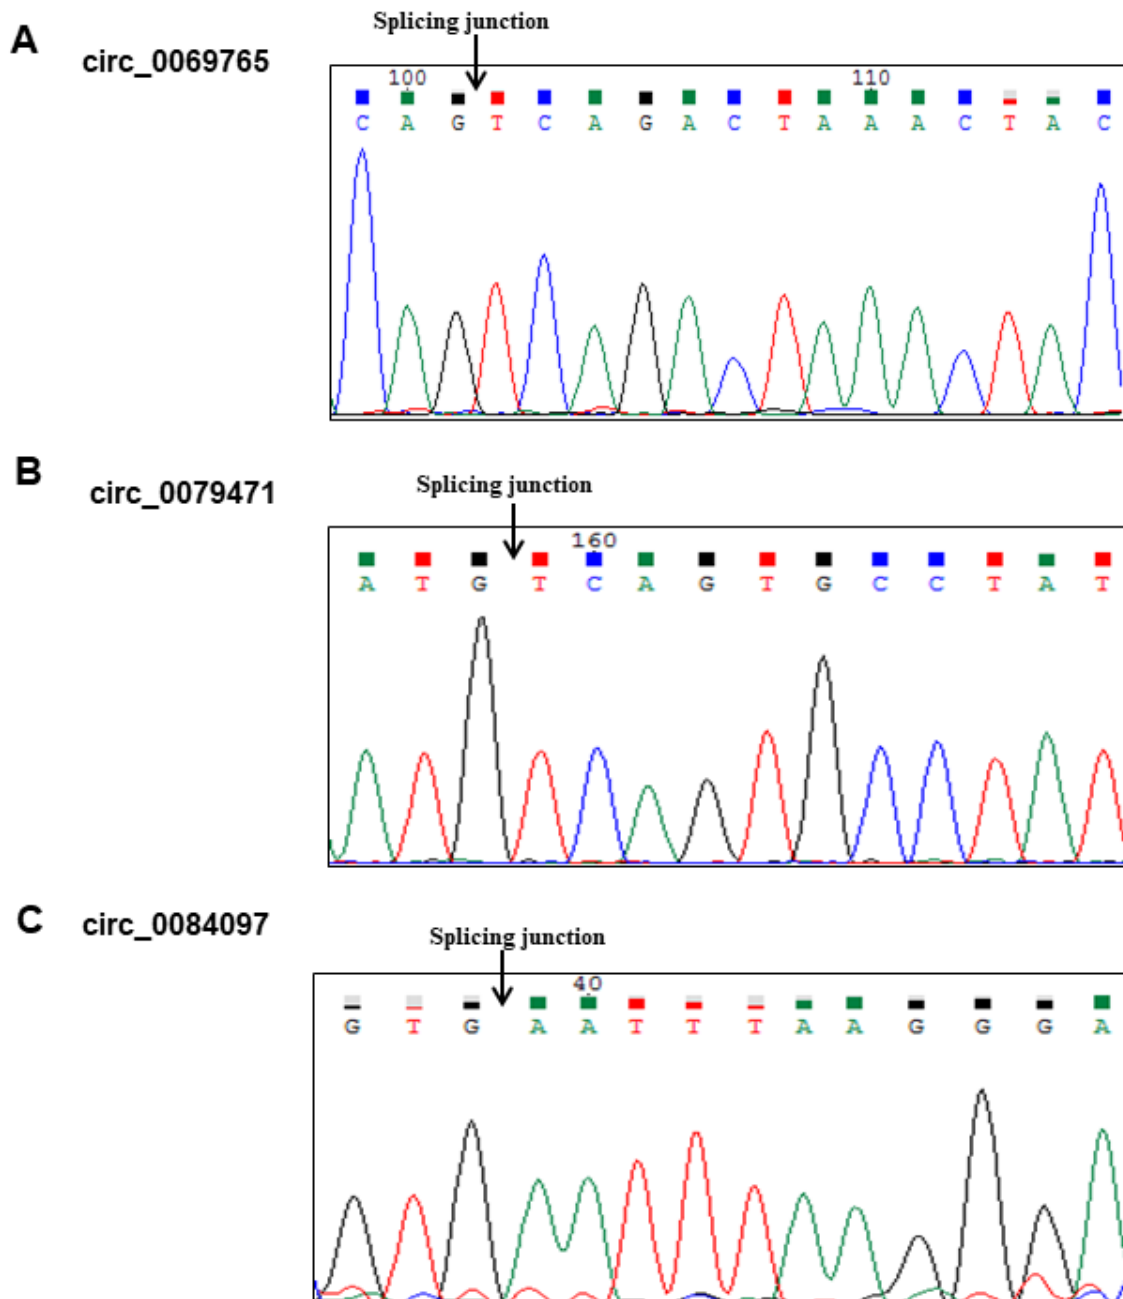

**2.4) Figure S4.** qRT-PCR analysis of the gene expression levels of circ\_0069766, circ\_0079471 and ETV1 in GIST cell lines.

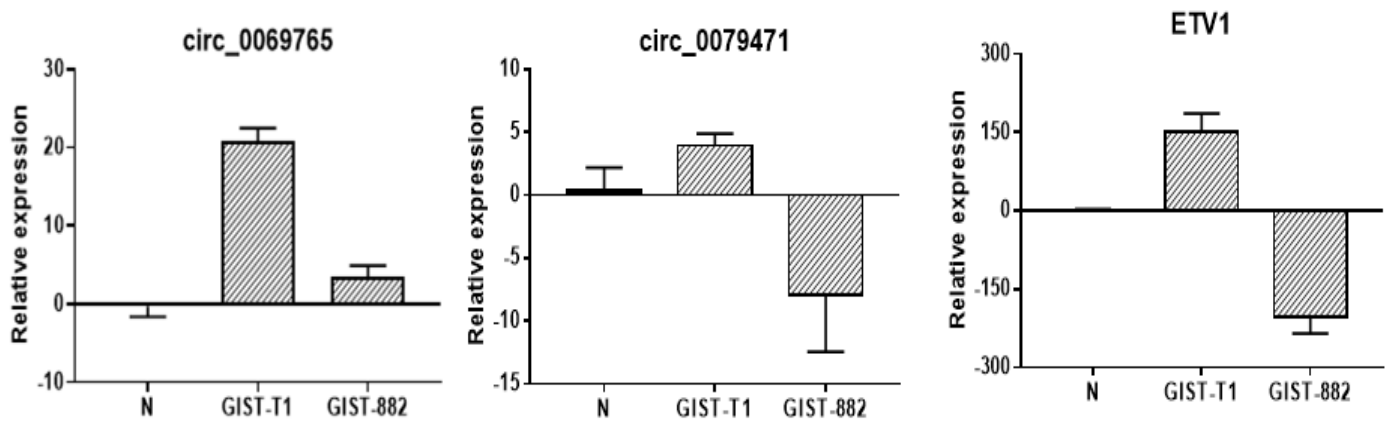

Supplement: DataSheet_1.pdf [file DataSheet_1.pdf]
